# Supplementary material for: High Proportion of Adult Cases and Prevalence of Metabolic Syndrome in Type 1 Diabetes Mellitus Population in Korea: A Nationwide Study
Source: PubMed Central journal article supplement — Diabetes Metab J. 2018 Aug 22;43(1):76–89. doi: 10.4093/dmj.2018.0048 (PMC6387882; doi:10.4093/dmj.2018.0048), 2018-08-22
Supplement: dmj-43-76-s001.pdf [file dmj-43-76-s001.pdf]

**Supplementary Table 1.** Prevalence of metabolic syndrome and its components in patients with typical and atypical T1DM according to national preventive health care database in 2013

|                                                              | In patients with prevalent typical T1DM | In patients with prevalent atypical T1DM |
|--------------------------------------------------------------|-----------------------------------------|------------------------------------------|
| Prevalence of metabolic syndrome                             |                                         |                                          |
| Total, unadjusted                                            | 2,156 (66.28)                           | 1,157 (69.82)                            |
| Men                                                          | 1,200 (61.19)                           | 624 (65.00)                              |
| Women                                                        | 956 (73.99)                             | 533 (76.47)                              |
| Total, age and sex-adjusted, % <sup>a</sup>                  | 53.57                                   | 57.73                                    |
| Prevalence of individual components of metabolic syndrome    |                                         |                                          |
| Abdominal obesity <sup>b</sup>                               | 1,260 (38.73)                           | 688 (41.52)                              |
| Men                                                          | 586 (29.88)                             | 300 (31.25)                              |
| Women                                                        | 674 (52.17)                             | 388 (55.67)                              |
| BP $\geq$ 130/85 mm Hg or medication use                     | 2,195 (67.48)                           | 1,154 (69.64)                            |
| Men                                                          | 1,356 (69.15)                           | 676 (70.42)                              |
| Women                                                        | 839 (64.94)                             | 478 (68.58)                              |
| Triglyceride $\geq$ 150 mg/dL or medication use <sup>c</sup> | 1,796 (55.21)                           | 980 (59.14)                              |
| Men                                                          | 1,018 (51.91)                           | 544 (56.67)                              |
| Women                                                        | 778 (60.22)                             | 436 (62.55)                              |
| HDL-C                                                        | 1,823 (56.04)                           | 1,026 (61.92)                            |
| Men <40 mg/dL or medication use <sup>c</sup>                 | 962 (49.06)                             | 538 (56.04)                              |
| Women <50 mg/dL or medication use <sup>c</sup>               | 861 (66.64)                             | 488 (70.01)                              |

Values are presented as number (%).

T1DM, type 1 diabetes mellitus; BP, blood pressure; HDL-C, high density lipoprotein cholesterol.

<sup>a</sup>Direct age and sex-adjustment was performed for the Korean population in the year 2010, <sup>b</sup>Waist circumference >90 cm in men and >80 cm in women using Asian-specific cut-off for abdominal obesity, <sup>c</sup>Statins, fibrates, and ezetimibes were included.
