# Supplementary material for: High Proportion of Adult Cases and Prevalence of Metabolic Syndrome in Type 1 Diabetes Mellitus Population in Korea: A Nationwide Study
Source: PubMed Central journal article supplement — Diabetes Metab J. 2018 Aug 22;43(1):76–89. doi: 10.4093/dmj.2018.0048 (PMC6387882; doi:10.4093/dmj.2018.0048), 2018-08-22
Supplement: dmj-43-76-s002.pdf [file dmj-43-76-s002.pdf]

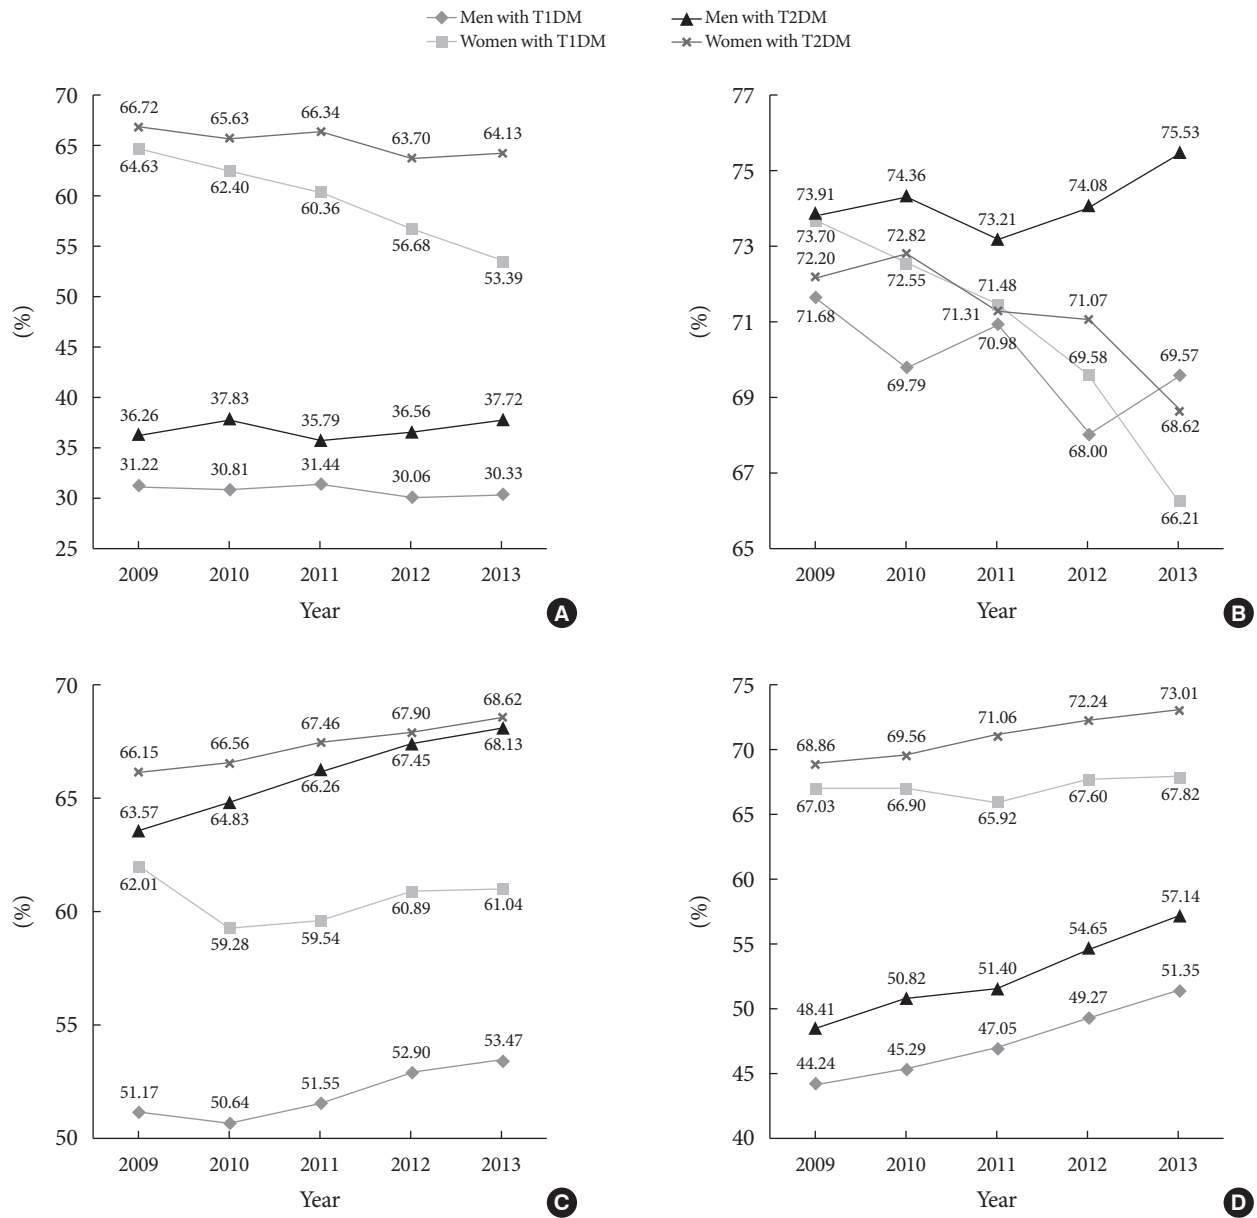

**Supplementary Fig. 1.** Prevalence of individual components of metabolic syndrome in men and women with prevalent type 1 diabetes mellitus (T1DM) and those with age- and sex-matched prevalent type 2 diabetes mellitus (T2DM) between 2009 and 2013. (A) Abdominal obesity. (B) Blood pressure ≥130/85 mm Hg or medication use. (C) Triglyceride ≥150 mg/dL or medication use. (D) High density lipoprotein cholesterol <40 mg/dL in men, <50 mg/dL in women or medication use.
